1 **The persistent influence of caste on under-five mortality:**  
2 **Factors that explain the caste-based gap in high focus Indian**  
3 **states**  
4

5 Jayanta Kumar Bora<sup>1,2\*</sup>, Rajesh Raushan<sup>2</sup>, Wolfgang Lutz<sup>1</sup>

6  
7 <sup>1</sup> Wittgenstein Centre for Demography and Global Human Capital (IIASA, VID/ ÖAW and WU), Austria

8 <sup>2</sup> Indian Institute of Dalit Studies, New Delhi, India  
9

10  
11  
12 \*Corresponding author  
13 E-mail: [jkbnwg@gmail.com](mailto:jkbnwg@gmail.com)  
14  
15

16

17

18

19

20

21

22

23

24

25

26

27

28

29

30

## 31 Abstract

32 **Objective:** Although under-five mortality (U5M) is declining in India, it is still high in a few selected states and among the  
33 scheduled caste (SC) and scheduled tribe (ST) population of the country. This study re-examines the association between castes and  
34 U5M in high focus Indian states following the implementation of the country's National Rural Health Mission (NRHM) program. In  
35 addition, we aim to quantify the contribution of socioeconomic determinants in explaining the gap in U5M between the SC/ST population  
36 and non-SC/ST population in high focus states in India.

37 **Data and method:** Using data from the National Family Health Survey (NFHS), we calculated the under-five mortality  
38 rate (U5MR) by applying a synthetic cohort probability approach. We applied a binary logistic regression model to examine the  
39 association of U5M with the selected covariates. Further, we used Fairlie's decomposition technique to understand the relative  
40 contribution of socioeconomic variables on U5M risk between the caste groups.

41 **Findings:** In high focus Indian states, the parallel gap in U5M between well-off and deprived caste children has disappeared in  
42 the post-NRHM period, indicating a positive impact in terms of reducing caste-based inequalities in the high focus states. Despite the  
43 reduction in U5M, particularly among children belonging to STs, children belonging to the SC and ST population still experience higher  
44 mortality rates than children belonging to the non-SC/ST population from 1992 to 2016. Both macro level (district level mortality rates)  
45 and individual (regression analysis) analyses showed that children belonging to SCs experience the highest likelihood of dying before  
46 their fifth birthday. A decomposition analysis revealed that 78% of the caste-based gap in U5M is due to the effect of women's level of  
47 educational attainment and household wealth between the SC/ST and non-SC/ST population. Program indicators such as place of delivery  
48 and number of antenatal care (ANC) visits also contributed significantly to widening caste-based gaps in U5M.

49 **Conclusion:** The study indicates that there is still scope to improve access to health facilities for mothers and children belonging  
50 to deprived caste groups in India. Continuous efforts to raise the level of maternal education and the economic status of people belonging  
51 to deprived caste groups should be pursued simultaneously.

52

53 **Key words:** Under-five mortality, NFHS, NRHM, scheduled tribe, scheduled caste, maternal education, high focused states, India,  
54 SDG Goals

55

56

57

58

59

## 60 **Introduction**

61 Mortality among children of age five and below has declined in most countries, with the decline accelerating since mid-2000 [1,2]. Yet,  
62 in the era of the Sustainable Development Goals (SDGs), the issue continues to be a major public health concern, particularly in low-  
63 and middle-income countries (LMICs). Among the LMICs, India contributes the highest number of deaths in children under five and  
64 socially disadvantaged groups disproportionately carries the burden of children dying at a young age.

65  
66  
67 The burden of child mortality in high focus states of India has been the concern of policy makers and researchers equally. The high-focus  
68 states in India were designated as such by the Indian government because of their persistently high child mortality and relatively poor  
69 socio economic and other health indicators. A recent study demonstrated that the majority of the districts in the high focus states are not  
70 likely to achieve the SDGs concerning the preventable death of new-borns [3]. This study re-examines the association between castes  
71 and under-five mortality (U5M) in high focus Indian states using the most recent data. It also aims to quantify the relative contribution  
72 of socioeconomic determinants to U5M by explaining the gap between socially disadvantaged (scheduled castes and scheduled tribes)  
73 and non-disadvantaged castes in high focus states.

74

## 75 **Caste affiliation and under-five mortality in India**

76

77 The Indian caste system is a traditional system of social stratification that has existed for more than three thousand years [4]. It is a social  
78 stratification system of self-governing and closed groups or communities called Jatis. These Jatis are assigned by birth and remains the  
79 same throughout an individual's life. The ancient Varna system divided Hindu society into initially four, and later five, distinct Varna or  
80 castes, that are mutually exclusive, hereditary, endogamous and occupation-specific. These are the Brahmins (priests), Kshatriyas  
81 (warriors), Vaisyas (traders and merchants) and Sudras (those engaged in menial jobs) and those doing the most despicable menial jobs-  
82 the Ati Sudras or the former untouchables [5]. The 'untouchables' have the lowest social standing. Another way of categorizing the  
83 castes, which is now used in India to direct certain policies, is scheduled castes (SCs), scheduled tribes (STs), other backward classes (all  
84 disadvantaged groups) and general castes (non-disadvantaged castes). People who belong to SCs were previously referred to as  
85 "untouchables", while the STs are communities of people living in tribal areas (mainly forest). SCs and STs are historically marginalized  
86 and disadvantaged social groups and are officially recognized and listed by the Indian Constitution. Interestingly, although castes  
87 originated within the Hindu religion, it also exists in the other religious groups in India such as Islam and Christian [6]. According to  
88 data obtained from the 2011 census of India, together, they constitute 25.2% of the country's total population (with SCs contributing  
89 16.6% and STs 8.6%).

90

91

92 Despite continuing efforts by modern governments to redress the effects of the caste system through a system of reservation (positive  
93 discrimination), caste remains a significant line of social division in India. The Indian Constitution has given people belonging to  
94 disadvantaged groups a special status since 1950 and makes provision for quotas in politics, education and job opportunities, as well as  
95 various other arrangements, including laws to abolish practices prolonging social inequities and development programs specially  
96 designed to cater to the needs of these groups [7]. However, they continue to face multiple difficulties compared to the rest of the  
97 population [8–10] and still have lower socioeconomic development indicators than the rest of the population [11]. These people are  
98 generally exposed to poor living conditions, observe a poor diet and have limited access to health care. In addition to their low  
99 socioeconomic circumstances, people in disadvantaged castes experience other adverse circumstances such as caste-based discrimination  
100 while accessing the health care system in India [12]. In addition, their life expectancy is relatively low and both child and adult mortality  
101 are relatively high [13]. In fact, people belonging to disadvantaged castes constitute almost 50% of all maternal deaths in the country and  
102 their children are more undernourished compared to the rest of the population [14,15].

103

104

105 The association between caste and child mortality is well documented [13,16–24]. In general, previous studies showed that children  
106 belonging to disadvantaged castes such as SCs/STs experience a higher likelihood of death compared to children belonging to non-  
107 deprived castes. It has also been found that caste differences in infant and child mortality are substantially reduced when parental  
108 socioeconomic characteristics are held constant [21]. In a recent study by Ranjan et al. (2016) [25], the authors concluded that the gap in  
109 infant mortality between tribal and non-tribal populations was substantial in the early months after birth, narrowed between the fourth  
110 and eighth months, and grew thereafter. The study by Dommaraju and colleagues (2008) [17] examined the effect of caste on child  
111 mortality and maternal health care utilization in rural India. They concluded that children belonging to lower castes have a higher risk of  
112 death and that women belonging to the lower castes have lower rates of antenatal and delivery care utilization than children and women  
113 belonging to the upper castes. The study further suggested the need to target low-caste members in the provision of maternal and child  
114 health services.

115

116

117 Has the association between caste and under-five mortality however been fading away in recent years due to the government's health  
118 programs? In 2005, the Indian government launched the National Rural Health Mission (NRHM), which was renamed the National  
119 Health Mission (NHM) in 2013, in an effort to improve the availability of and access to quality health care for the poor, as well as for  
120 women and children, especially in rural areas. The program was introduced with a special focus on the nine socioeconomically  
121 disadvantaged high focus states. In the same period, the reproductive, maternal, newborn, child and adolescent health (RMNCH+A)  
122 approach was launched to address major causes of mortality among women and children, as well as the delays in accessing and utilizing  
123 health care and services. Many components of the NHM directly address the issues related to U5M and health status. There have been  
124 numerous initiatives under the NRHM-NHM to enhance newborn care and delivery. Through the introduction of the Janani-Shishu  
125 Suraksha Karyakram (JSSK), the Accredited Social Health Activists (ASHA) are expecting to increase institutional delivery and  
126 significantly bring down the neonatal mortality rate. The Indian government is implementing Janani Suraksha Yojana (JSY) which is a  
127 safe motherhood scheme to reduce maternal and infant mortality by promoting institutional delivery among pregnant women by providing

128 conditional cash assistance. The larger institutional framework of NHM complements the JSY cash incentive by providing  
129 comprehensive healthcare, including antenatal and post-natal services, transport to facilities, and support services from ASHA. It includes  
130 several support services administered by community health workers to encourage pregnant women to use healthcare facilities for  
131 childbirth, along with at least three antenatal check-ups [26].

132  
133  
134 Following the implementation of NRHM, India has avoided nearly one million child deaths across socioeconomic groups between 2005  
135 and 2015 [27]. The program is credited with having greatly reduced the inequities in maternal health services through increased  
136 institutional delivery and antenatal care in the high focus and deprived states of India [28].

137  
138  
139 Does this substantial coverage of maternal and health care services in recent years however reduce the caste-based gaps in U5M in high  
140 focus states? Recently available nationally representative data, commonly known as the National Family Health Survey (NFHS) allowed  
141 us to re-examine the association between caste and child mortality in India. We also wanted to determine what the relative role of  
142 socioeconomic characteristics was in explaining the gap in U5M between the caste groups in the country, if the caste-based gap in U5M  
143 were to continue. To our knowledge, these questions had not previously been answered in recent literature. Therefore, we aimed to extend  
144 the previous knowledge on caste disparity in several directions. First, we re-examined the association between caste and U5M in the high  
145 focus states. Our study is exclusively based on high focus states in north-central and eastern India, which contributed nearly 46% of the  
146 total number of under five deaths between 2005 and 2015 and were found to be lagging behind in terms of achieving the SDG goals on  
147 U5M [3]. Secondly, we provide district level estimates of U5M for the SC and ST population. To our knowledge, no previous study has  
148 examined district level variations in the under-five mortality rate (U5MR) among disadvantaged castes. Finally, we explain the caste  
149 based gap in U5M by applying an extension Oaxaca-type decomposition for nonlinear models as suggested by Fairlie [29]. The findings  
150 of this study can help to understand the factors behind the pervasive gap in U5MR between deprived and other caste groups in India.

151

## 152 **Data**

### 153 **Ethics statement**

154 The study is based on an anonymous publicly available dataset with no identifiable information on the survey participants and no ethics  
155 statement is required for this research work.

156

157 We used data from the fourth round of the Indian Demographic Health Surveys (DHS), commonly known as National Family Health  
158 Surveys (NFHS) conducted between 2015 and 2016. Data from the previous three rounds of NFHS were only used for trend analysis.  
159 The 2015-2016 NFHS survey was conducted by the International Institute of Population Sciences (IIPS), Mumbai under the stewardship  
160 of the Ministry of Health and Family Welfare (MoHFW) of the government of India. The survey was based on 1,315,617 births from  
161 601,509 households and was covered by 699,686 interviews with women aged between 15 and 49 years old. The sample was selected

162 using a two-stage sample design and covers all 640 districts as per the 2011 census. During the first stage, villages was selected as the  
163 primary sampling units (PSUs) for rural areas with probability proportional to size, while for urban areas, census enumeration blocks  
164 (CEB) were used. During the second stage, a random selection of 22 households in each PSU and CEB was made for rural and urban  
165 areas, respectively. The unit level data is available from the DHS data repository and can be accessed on request. A detailed description  
166 of the survey design of the NFHS-4 is available in the national report [30].

167

168

169 We restricted our analysis to the high focus states that used in previous studies [31–34] with women belonging to 304 districts according  
170 to 2011 census of India. The nine high focus states are Assam, Bihar, Chhattisgarh, Jharkhand, Madhya Pradesh, Odisha, Rajasthan,  
171 Uttarakhand and Uttar Pradesh. These are the most populous, containing 48.5% of India's population. They are located in the north-  
172 central and eastern belt of the country, are characterized by poor demographic and health indicators, and have under five and neonatal  
173 mortality rates higher than the national level.

174

## 175 **Methods and measures**

### 176 **Outcome variable**

177 The outcome variable in the study is U5M, which is defined as the probability of dying before reaching the age of five. We assigned a  
178 value of “1” if the child died and “0” if the child was alive for the outcome variable.

### 179 **Predictors**

180 The predictors used in this analysis are broadly divided into three categories: demographic, socioeconomic and program variables. These  
181 variables were considered as they were found to be important determinants of U5M in previous literature. Under demographic variables,  
182 we included the sex of the child, the mother’s age at the birth of her first child (<20, 20-24 and 25 years or more) and the birth order of  
183 the children (1, 2-3 and 4+).

184

185

186 Under socioeconomic variables, we included caste affiliation, parents’ level of educational attainment, type of residence and wealth  
187 quintile of the household, type of fuel used for cooking, type of toilet facilities and source of drinking water. The caste group is the core  
188 predictor used in this analysis. We categorized caste into three categories namely SC, ST and non-SCST. We categorized the mother and  
189 father’s level of education into three groups: primary or below (5 or less than 5 years of schooling), secondary (6 to 12 years of schooling)  
190 and higher (more than 12 years of education).

191

192

193 In terms of wealth, the NFHS survey did not collect information on income. The economic status of a woman was assessed by computing  
194 a composite index of household wealth indicating possession of wealth or assets by the household to which they belonged. We computed

195 the wealth quintile of the household separately using the methodology followed in the fourth round of the NFHS. We excluded the  
196 variables of sanitation, source of drinking water and cooking fuel while constructing the wealth index. Using the total score, a household  
197 was categorized as belonging to the poorest, poorer, middle, richer and richest group. For convenience of analysis we grouped the five  
198 categories of the wealth quantile into three simplified categories by combining the poorest and poorer group into a new category named  
199 “poor“, the middle group remained “middle’ and the richer and richest groups were combined to form the “rich” category. Among the  
200 program indicators, the place of delivery of the child (home vs institutional delivery) and frequency of antenatal care (ANC) visits (none,  
201 1 time, 2-3 times and 4+) during the pregnancy of last birth was considered in our analysis.

202

203

## 204 **Measures**

### 205 **U5MR estimation**

206 Mortality estimation was carried out using a dataset with full birth histories and information gathered from women aged 15 to 49 years  
207 surveyed in the NFHS. In the analysis, we considered only those births and deaths that took place five years preceding the survey.  
208 However, we chose the reference period of the district level U5MR estimates as “ten years prior to the survey date” in order to maximize  
209 the size of the sample needed to estimate those rates at district level. We applied direct methods of mortality-rate estimation using data  
210 on the children's date-of-birth and their survival status, as well as the date-of-death and age at death of deceased children. Rustein and  
211 Rojas describe the synthetic cohort probability approach using the full birth history data of women aged 15 to 49 to estimate the U5MR  
212 rate [35] on DHS data. A synthetic cohort life table approach used in a previous study (3) used the same method as that used to produce  
213 the child mortality rate in DHS reports using the STATA package “syncmrates” [36].

214

215

216 We carried out the district level estimations of the U5MR for SCs, STs and non-SC/ST populations separately, with a 95% confidence  
217 interval and level of significance. Our inferences regarding the U5MR are strictly based on the districts for which 1) estimated U5MR  
218 are statistically significant at a 10% level of significance; and 2) estimated mortality rates are greater than zero. Thus, we provide all  
219 estimates in the appendices to this paper, and showed significant, insignificant, and “not enough sample size” in the districts for estimates  
220 separately in Figure 2.

221

### 222 **Statistical analysis**

223 We used bivariate analysis to examine the differences in outcome and selected predictors between the SC, ST and non-SC/ST population.  
224 A binary logistic regression model was employed to examine the association between U5M and exposure variables. All exposure  
225 variables were tested with the variance inflation factor (VIF) to account for possible multi-collinearity before using the binary logistic  
226 regression model.

227

## 228 **Decomposition analysis**

229 The Blinder–Oaxaca decomposition technique [37,38] is commonly used to identify and quantify the factors associated with inter-group  
230 differences in the mean level of outcome. This technique, however, is not appropriate if the outcome variable is binary, such as child  
231 mortality. Hence, we used the extension of the Blinder–Oaxaca technique developed by Fairlie [29] which is appropriate for binary  
232 models, to decompose the gap between social groups with U5M risk into contributions that can be attributed to different factors. For the  
233 decomposition analysis, we used the *'fairlie'* command available for Stata. A detailed description of this method is discussed in appendix  
234 (Appendix S1). We used STATA S.E. 15.0 (STATA Corp., Inc., College Station, TX) version software to carry out the mentioned  
235 analysis in this study.

236

## 237 **Results**

### 238 **Level and trends in U5MR among different social groups in high focus** 239 **states of India**

240

241 Fig 1 shows the trends in U5MR within the SC, ST and non-SC/ST populations in high focus states together for 1992-93 to 2015-16. It  
242 is observed that despite U5M having declined the most among children belonging to STs, it is still higher among SCs and STs than  
243 among the non-SC/ST population during 1992 to 2016. Compared to 1992-2005, the reduction in the U5MR was higher in the most  
244 recent period irrespective of caste groups. It is also clear from Figure 1 that the U5MR in high focus states is substantially higher than  
245 the target specified in SDG3 (at least as low as 25 per 1000 live births in 2030) and the national average (50 deaths per 1000 live births  
246 in NFHS4) for preventable deaths among children under five. On average, the estimated U5MR of high focus states are more than double  
247 the amount specified in the SDG3 target across all caste groups. Another striking point of this graph is that the parallel gap in U5MR  
248 between SC and ST and non-SC/ST populations between 1992 and 2005 was reduced drastically in 2015-2016.

249

#### 250 **Fig 1. Trends in U5MR among social groups in high focus states, India 1992-2016**

251

252 Table 1 shows the current level of U5MR of SC, ST and non-SC/ST population in the selected high focus states. The estimation result is  
253 presented with *p*- value and 95% confidence interval (CI). The results reveal that U5MR for SC children belonging to Bihar, Jharkhand,  
254 Madhya Pradesh, Rajasthan and Uttar Pradesh are substantially higher than that of Non-SC/ST children. On the other hand, U5MR of  
255 ST children belonging to Chhattisgarh, Jharkhand, Madhya Pradesh, Orissa and Rajasthan are relatively higher than the corresponding  
256 U5MR of non-SC/ST population.

257

258

259

260

261



262

263

264

265

266

**Table 1. U5MR (per 1000 live births) in five years preceding the survey for SC,ST and Non-SC/ST population in high focus states of India, 2015-16**

| High focus states | SC          |              |             |             | ST          |              |             |             | Non-SC/ST   |              |             |             |
|-------------------|-------------|--------------|-------------|-------------|-------------|--------------|-------------|-------------|-------------|--------------|-------------|-------------|
|                   | U5MR        | P value      | 95% CI      |             | U5MR        | P value      | 95% CI      |             | U5MR        | P value      | 95% CI      |             |
|                   |             |              | Lower       | Upper       |             |              | Lower       | Upper       |             |              | Lower       | Upper       |
| Assam             | 50.3        | 0.000        | 31.9        | 68.7        | 51.0        | 0.000        | 39.3        | 62.7        | 58.1        | 0.000        | 52.9        | 63.4        |
| Bihar             | 72.9        | 0.000        | 65.0        | 80.9        | 52.5        | 0.000        | 38.7        | 66.2        | 54.0        | 0.000        | 50.2        | 57.8        |
| Chhattisgarh      | 56.4        | 0.000        | 40.1        | 72.8        | 80.0        | 0.000        | 69.5        | 90.6        | 56.5        | 0.000        | 47.0        | 65.9        |
| Jharkhand         | 59.5        | 0.000        | 47.7        | 71.2        | 63.8        | 0.000        | 55.2        | 72.4        | 48.6        | 0.000        | 42.0        | 55.2        |
| Madhya Pradesh    | 68.5        | 0.000        | 62.4        | 74.6        | 78.3        | 0.000        | 71.5        | 85.0        | 57.8        | 0.000        | 53.4        | 62.2        |
| Orissa            | 45.3        | 0.000        | 35.4        | 55.1        | 65.1        | 0.000        | 53.8        | 76.5        | 39.7        | 0.000        | 33.9        | 45.4        |
| Rajasthan         | 61.8        | 0.000        | 54.0        | 69.5        | 57.8        | 0.000        | 50.2        | 65.5        | 45.3        | 0.000        | 41.1        | 49.4        |
| Uttar Pradesh     | 85.5        | 0.000        | 79.9        | 91.1        | 58.5        | 0.000        | 37.0        | 80.1        | 76.0        | 0.000        | 72.5        | 79.4        |
| Uttarakhand       | 43.8        | 0.000        | 32.9        | 54.7        | 35.9        | 0.004        | 11.8        | 60.0        | 48.0        | 0.000        | 41.3        | 54.7        |
| <b>India</b>      | <b>55.8</b> | <b>0.000</b> | <b>53.7</b> | <b>58.0</b> | <b>57.2</b> | <b>0.000</b> | <b>53.7</b> | <b>60.8</b> | <b>46.6</b> | <b>0.000</b> | <b>45.4</b> | <b>47.9</b> |

267

268

269

270

271

## District level variation in U5MR by caste group in the districts of high focus states

272

273

274

275

276

277

278

279

280

281

We present district-level estimates of U5MR (S1 Table and Fig 2) for the SC, ST, non-SC/ST and total population separately. Each estimated value is supported by a *p* value and a 95% confidence interval to indicate the statistical significance of the U5M estimate. S2 Fig presents district level estimates of U5MR by caste groups. While 59% (105 of 179 districts with significant estimates) of the districts have higher mortality for the ST population (higher than 70 per 1000 live births), only 29% (88 of 302 districts with significant estimates) of districts have higher mortality for the non-SC/ST population. The corresponding figure for the SC population is 52% (148 of 283 districts with significant estimates). On the other hand, 14% (41 out of 283) of SCs, 18% (32 out of 179) of STs and 33% (101 out of 302) of non-SC/STs belong to districts with an U5MR range of below 50. Our findings show that districts performing poorly in terms of U5MR for the SC population are geographically concentrated in the states of Rajasthan, Uttar Pradesh, Bihar, and Madhya Pradesh, whereas for STs populations, they are concentrated in Madhya Pradesh, Chhattisgarh, and Orissa.

282

283

284

**Fig 2. District wise U5MR (per 1000 live births) for SC, ST, non-SC/ST and Total populations in high focus states of India, 2015-16**

285

## Socioeconomic differentials of each caste group

286

287

288

289

Table 2 shows differences in the selected demographic, socioeconomic and program indicators from SCs, STs and the non-SC/ST population. U5M is higher among SCs and STs compared to the non-SC/ST group. While the mothers of approximately 40% of the SC and ST children have their first child before the age of 20 years, only 35% of the mothers of non-SC/ST children gave birth for the first

290 time before age 20. There are more children with a birth order of four or higher among the SC (23%) and ST (20%) population compared  
 291 to that for non-SC/ST children (18%). We also observed that the mother’s level of education varies widely by caste group. The number  
 292 of parents with a secondary and higher level of educational attainment is lower for the parents of SC/ST children than for the parents of  
 293 non-SC/ST children. About 71% of SC and 83% of ST children belong to poor households compared to only 53% of non-SC/ST children.  
 294 Similarly, about 85% of SC and 93% of ST children live in rural areas, whereas 79% of the non-SC/ST children are rural inhabitants.  
 295  
 296 In terms of environmental factors, the use of solid fuel for cooking is higher among the households of SC (85%) and ST (93%) children  
 297 compared to those of non-SC/ST (74%) children. The use of unimproved sanitation facilities and unsafe sources of drinking water are  
 298 substantially higher among ST children compared to non-SC/ST children. As far as program indicators are concerned, the proportion of  
 299 institutional delivery is lower and the number of “never visit” responses for ANC during pregnancy is higher among SCs and STs  
 300 compared to those of the non-SC/ST population in the high focus states of India.  
 301

302 **Table 2. Comparison of selected characteristics of children under five by social groups of high focus states in India, 2015–16**  
 303

| Characteristics                                  | SC     |      | ST     |      | Non SC/ST |      | Total    |      |
|--------------------------------------------------|--------|------|--------|------|-----------|------|----------|------|
|                                                  | N      | %    | N      | %    | N         | %    | N        | %    |
| <b>Under-five mortality</b>                      |        |      |        |      |           |      |          |      |
| No                                               | 28,781 | 93.8 | 15,525 | 94.4 | 93,940    | 94.7 | 1,38,247 | 94.5 |
| Yes                                              | 1,890  | 6.2  | 928    | 5.6  | 5,264     | 5.3  | 8,082    | 5.5  |
| <b>Demographic indicators</b>                    |        |      |        |      |           |      |          |      |
| <b>Sex of the child</b>                          |        |      |        |      |           |      |          |      |
| Female                                           | 14,846 | 48.4 | 8,103  | 49.3 | 46,982    | 47.4 | 69,931   | 47.8 |
| Male                                             | 15,826 | 51.6 | 8,350  | 50.7 | 52,222    | 52.6 | 76,398   | 52.2 |
| <b>Mother’s age at first birth (yr)</b>          |        |      |        |      |           |      |          |      |
| <20                                              | 12,336 | 40.2 | 6,688  | 40.6 | 35,067    | 35.3 | 54,091   | 37.0 |
| 20-24                                            | 15,348 | 50.0 | 7,839  | 47.6 | 51,093    | 51.5 | 74,280   | 50.8 |
| ≥ 25                                             | 2,988  | 9.7  | 1,926  | 11.7 | 13,045    | 13.1 | 17,958   | 12.3 |
| <b>Birth order</b>                               |        |      |        |      |           |      |          |      |
| First                                            | 10,369 | 33.8 | 6,176  | 37.5 | 38,157    | 38.5 | 54,702   | 37.4 |
| 2-3                                              | 13,219 | 43.1 | 7,073  | 43.0 | 43,193    | 43.5 | 63,484   | 43.4 |
| 4+                                               | 7,084  | 23.1 | 3,204  | 19.5 | 17,855    | 18.0 | 28,143   | 19.2 |
| <b>Socioeconomic indicators</b>                  |        |      |        |      |           |      |          |      |
| <b>Mother’s level of education</b>               |        |      |        |      |           |      |          |      |
| Primary or below                                 | 19,388 | 63.2 | 11,106 | 67.5 | 51,176    | 51.6 | 81,670   | 55.8 |
| Secondary                                        | 9,669  | 31.5 | 4,833  | 29.4 | 38,328    | 38.6 | 52,830   | 36.1 |
| Higher                                           | 1,615  | 5.3  | 514    | 3.1  | 9,701     | 9.8  | 11,829   | 8.1  |
| <b>Father’s level of education<sup>s</sup></b>   |        |      |        |      |           |      |          |      |
| Primary or below                                 | 2,246  | 40.4 | 1,598  | 49.3 | 6,167     | 33.3 | 10,011   | 36.6 |
| Secondary                                        | 2,827  | 50.8 | 1,418  | 43.7 | 9,491     | 51.3 | 13,736   | 50.3 |
| Higher                                           | 489    | 8.8  | 227    | 7.0  | 2,853     | 15.4 | 3,570    | 13.1 |
| <b>Type of residence</b>                         |        |      |        |      |           |      |          |      |
| Urban                                            | 4,678  | 15.3 | 1,242  | 7.5  | 21,309    | 21.5 | 27,228   | 18.6 |
| Rural                                            | 25,994 | 84.7 | 15,211 | 92.5 | 77,896    | 78.5 | 1,19,101 | 81.4 |
| <b>Wealth quintile (household)</b>               |        |      |        |      |           |      |          |      |
| Poor                                             | 21,623 | 70.5 | 13,579 | 82.5 | 52,108    | 52.5 | 87,310   | 59.7 |
| Middle                                           | 4,382  | 14.3 | 1,508  | 9.2  | 16,810    | 16.9 | 22,701   | 15.5 |
| Rich                                             | 4,666  | 15.2 | 1,366  | 8.3  | 30,286    | 30.5 | 36,318   | 24.8 |
| <b>Type of fuel used for cooking<sup>#</sup></b> |        |      |        |      |           |      |          |      |
| Clean fuel & food not cooked                     | 4,249  | 14.8 | 1,052  | 6.7  | 24,069    | 26.1 | 29,371   | 21.5 |
| Solid fuel                                       | 24,503 | 85.2 | 14,602 | 93.3 | 68,212    | 73.9 | 1,07,317 | 78.5 |
| <b>Type of toilet<sup>#</sup></b>                |        |      |        |      |           |      |          |      |
| Improved toilet                                  | 7,363  | 25.6 | 2,665  | 17.0 | 40,651    | 44.1 | 50,680   | 37.1 |
| Not improved toilet                              | 21,389 | 74.4 | 12,989 | 83.0 | 51,630    | 55.9 | 86,007   | 62.9 |
| <b>Source of drinking water<sup>#</sup></b>      |        |      |        |      |           |      |          |      |
| Improved water                                   | 26,891 | 93.5 | 12,529 | 80.0 | 86,185    | 93.4 | 1,25,605 | 91.9 |
| Not improved water                               | 1,862  | 6.5  | 3,125  | 20.0 | 6,096     | 6.6  | 11,083   | 8.1  |
| <b>Program indicators</b>                        |        |      |        |      |           |      |          |      |
| <b>Place of birth</b>                            |        |      |        |      |           |      |          |      |

|                                                       |               |            |               |            |               |            |                 |            |
|-------------------------------------------------------|---------------|------------|---------------|------------|---------------|------------|-----------------|------------|
| Home delivery                                         | 9,132         | 29.9       | 5,747         | 35.0       | 25,535        | 25.8       | 40,414          | 27.7       |
| Institutional delivery                                | 21,432        | 70.1       | 10,657        | 65.0       | 73,380        | 74.2       | 1,05,468        | 72.3       |
| <b>Antenatal visits during pregnancy (last birth)</b> |               |            |               |            |               |            |                 |            |
| None                                                  | 5,894         | 27.6       | 2,914         | 24.5       | 16,164        | 22.6       | 24,972          | 23.8       |
| 1 visit                                               | 1,821         | 8.5        | 682           | 5.7        | 5,437         | 7.6        | 7,940           | 7.6        |
| 2-3 visits                                            | 7,972         | 37.3       | 4,106         | 34.5       | 25,744        | 36.0       | 37,822          | 36.1       |
| 4+ visits                                             | 5,672         | 26.6       | 4,197         | 35.3       | 24,241        | 33.9       | 34,110          | 32.5       |
| <b>Total</b>                                          | <b>30,671</b> | <b>100</b> | <b>16,453</b> | <b>100</b> | <b>99,204</b> | <b>100</b> | <b>1,46,329</b> | <b>100</b> |

304 <sup>§</sup>Excluded missing cases. <sup>#</sup>Not included de jure resident. All percentages are weighted cases

305 All the covariates are tested with Pearson chi-squared test and found to be statistically significant at  $p < 0.001$

306

307

## 308 Association between U5M and different demographic, socioeconomic 309 and program indicators 310

311 The association between U5M and different demographic, socioeconomic and program indicators are presented in the logistic regression  
312 model in Table 3. In model 1, we present the unadjusted effect of caste on U5M. The results show that compared to non-SC/ST children,  
313 SC (OR: 1.19,  $p < 0.01$ , SE:0.03) and ST (OR: 1.10,  $p < 0.05$ , SE:0.03) children have a higher likelihood of dying. After controlling for other  
314 socioeconomic factors in model 2, children belonging to SCs have a 1.15 times higher likelihood of dying. We did not find a statistically  
315 significant coefficient for children belonging to scheduled castes in model 2.

316

317 The regression results also revealed that parents' level of educational attainment has a statistically significant effect on reducing U5M  
318 and as expected, U5M shows significant declines with increases in the educational level of the parents. Children are less likely to die  
319 when their parents have completed secondary and higher education than children born to parents who have a primary level of education  
320 or lower. Similar results were observed for household wealth as for educational attainment. As the level of wealth of the household  
321 increases, the odds of U5M significantly decreases. It is important to note that the effect of parental education in the reduction of U5M  
322 is more rigorous than the effect of the household wealth quintile. The odds ratio for children of a mother with a secondary level education  
323 is 0.83 ( $p < 0.01$ , SE:0.03) versus the odds ratio for children belonging to the middle wealth quintile, which is 0.90 ( $p < 0.05$ , SE:0.05). The  
324 odds ratio for children of highly educated mothers is 0.68 ( $p < 0.01$ , SE:0.06) versus an odds ratio for children that belong to the "rich"  
325 quintile, which is 0.75 ( $p < 0.01$ , SE:0.04).

326

327 The age of mothers at the birth of their first child was found to be significantly associated with U5M. Children born to women aged 25  
328 years or older had significantly higher odds (OR: 1.13,  $p < 0.05$ , SE:0.06) of child mortality than babies born to women younger than 20  
329 years. Birth order was significantly associated with U5M and the results show that children with a birth order of four or more (OR: 1.19,  
330  $p < 0.01$ , SE:0.05) have a higher likelihood of dying before the age of five. Male children had slightly higher odds of dying before their  
331 fifth birthday compared to female children, but the finding was not statistically significant.

332

333 Among the environmental factors, the type of toilet used is significantly associated with U5M. The likelihood of U5M is higher among  
334 children from households with non-improved toilet facilities (OR: 1.14,  $p < 0.01$ , SE:0.05) compared to children of households with  
335 improved toilet facilities. Place of birth and number of ANC visits during pregnancy were found to be significant indicators in reducing

336 U5M in the high focused states of India. The likelihood of lower U5M was also increased when mothers were able to opt for institutional  
 337 delivery (OR: 0.92,p<0.05, SE:0.03) rather than home delivery. The findings also show that as the frequency of ANC visits increase, the  
 338 odds of U5M decreases significantly.

339  
 340  
 341

**Table 3. Logit estimates of U5M by different characteristics of high focus states in India, 2015-16**

| Variables                                       | U5M                        |                          |
|-------------------------------------------------|----------------------------|--------------------------|
|                                                 | Unadjusted OR<br>(Model 1) | Adjusted OR<br>(Model 2) |
| <b>Demographic indicators</b>                   |                            |                          |
| <b>Sex of the child</b>                         |                            |                          |
| Female ®                                        |                            |                          |
| Male                                            |                            | 1.01(0.03)               |
| <b>Mother's age at first birth (yr)</b>         |                            |                          |
| <20®                                            |                            |                          |
| 20-24                                           |                            | 0.97(0.03)               |
| ≥ 25                                            |                            | 1.13**(0.06)             |
| <b>Birth order</b>                              |                            |                          |
| 1 ®                                             |                            |                          |
| 2-3                                             |                            | 0.76***(0.03)            |
| 4+                                              |                            | 1.19***(0.05)            |
| <b>Socioeconomic indicators</b>                 |                            |                          |
| <b>Caste</b>                                    |                            |                          |
| Non-SC/ST®                                      |                            |                          |
| SC                                              | 1.19***(0.03)              | 1.15***(0.05)            |
| ST                                              | 1.10**(0.03)               | 0.93(0.04)               |
| <b>Mother's level of education</b>              |                            |                          |
| Primary or below ®                              |                            |                          |
| Secondary                                       |                            | 0.83***(0.03)            |
| Higher                                          |                            | 0.68***(0.06)            |
| <b>Father's level of education</b>              |                            |                          |
| Primary or below ®                              |                            |                          |
| Secondary                                       |                            | 0.75***(0.06)            |
| Higher                                          |                            | 0.68***(0.10)            |
| <b>Type of residence</b>                        |                            |                          |
| Urban®                                          |                            |                          |
| Rural                                           |                            | 1.02(0.05)               |
| <b>Wealth quintile (household)</b>              |                            |                          |
| Poor ®                                          |                            |                          |
| Middle                                          |                            | 0.90**(0.05)             |
| Rich                                            |                            | 0.75***(0.04)            |
| <b>Type of fuel for cooking</b>                 |                            |                          |
| Clean fuel & food not cooked ®                  |                            |                          |
| Solid fuel                                      |                            | 0.93(0.05)               |
| <b>Type of toilet</b>                           |                            |                          |
| Improved toilet ®                               |                            |                          |
| Not improved toilet                             |                            | 1.14***(0.05)            |
| <b>Source of drinking water</b>                 |                            |                          |
| Improved water ®                                |                            |                          |
| Not improved water                              |                            | 0.93(0.05)               |
| <b>Program indicators</b>                       |                            |                          |
| <b>Place of delivery</b>                        |                            |                          |
| Home delivery®                                  |                            |                          |
| Institutional delivery                          |                            | 0.92**(0.03)             |
| <b>ANC visits during pregnancy (last birth)</b> |                            |                          |
| None ®                                          |                            |                          |
| 1 visit                                         |                            | 0.87**(0.06)             |
| 2-3 visits                                      |                            | 0.85***(0.04)            |
| 4+ visits                                       |                            | 0.73***(0.03)            |
| <b>Constant</b>                                 | 0.05***(0.01)              | 0.07***(0.01)            |
| <b>Observation</b>                              | <b>1,46,329</b>            | <b>113,325</b>           |

342 Notes: OR-Odds ratio; (a) \*\*\* p<0.01, \*\* p<0.05, \* p<0.1 (b) The entries in parenthesis refer to standard errors  
 343 (c) ® indicate reference category

344  
 345

## 346 Results of the decomposition analysis

347 The results of the detailed decomposition are presented in Table 4. To make our results more readable, we present the coefficient in terms  
 348 of percentages in Figure 3. The positive contribution of a covariate indicates that this particular covariate contributed to widening the  
 349 U5M gap between SCs/STs and the non-SC/ST populations, while the negative contribution of a covariate indicates that it was helping  
 350 to reduce the gap. Our results indicate that 73% of the U5M gap between SCs/STs and the non-SC/ST population can be explained by  
 351 the factors included in the analysis. The unexplained gap (27%) for U5M might be related to other structural factors not covered by the  
 352 dataset in the analysis.

353  
 354 Of the explained gap, 78% can be related to differences in the distribution of women’s educational attainment and household wealth for  
 355 U5M risk. Household wealth is the most significant contributor (59%) to the gap in U5M between SCs and STs followed by the mother’s  
 356 level of educational attainment (19%). Program indicators such as place of delivery and number of ANC visits also contribute (12% each  
 357 respectively) to widening the U5M gap between SCs/STs and the non-SC/ST population at a 10% level of significance. Demographic  
 358 variables such as the sex of the child, the mother’s age at the birth of her first child and birth order contributed to reducing the gap. While  
 359 the source of drinking water narrowed the gap (9%), the type of toilet used in the household diminished the caste gap in U5M, although  
 360 not significantly. The type of fuel used for cooking and the type of residence widened the caste gap in U5M risk, although its contributions  
 361 are not statistically significant.

362 **Table 4. Results of Fairlie decomposition of average gap in U5M risk between caste groups in the high focus states of India, 2015-**  
 363 **16**  
 364  
 365

| Covariates                    | U5M               |
|-------------------------------|-------------------|
|                               | Contribution      |
| Mother’s level of education   | 0.934***          |
| Father’s level of education   | 0.001             |
| Mother’s age at first birth   | -0.143            |
| Sex of the child              | -0.140**          |
| Birth order                   | -0.069            |
| Wealth of the household       | 2.885***          |
| Type of fuel used for cooking | 0.403             |
| Type of toilet                | -0.081            |
| Source of drinking water      | -0.270**          |
| Type of residence             | 0.200             |
| Place of delivery             | 0.566***          |
| ANC visits                    | 0.610***          |
| <b>Total gap</b>              | <b>6.69</b>       |
| <b>Explained gap</b>          | <b>4.90 (73%)</b> |
| <b>Number of observations</b> | <b>1,13,325</b>   |

366 Note: (a)\*\*\* p< 0.01, \*\* p< 0.05 & \* p< 0.10  
 367  
 368

369 **Fig 3. Results of Fairlie decomposition analysis showing percentage contribution of each covariate to the gap in U5M-risk**  
 370 **between caste groups in high focused states of India, 2015–16**  
 371  
 372

## 373 Discussion and conclusion

374  
375 Any country's general medical and public health conditions, and consequently its level of socioeconomic development, can be measured  
376 based on the health of its children. Although U5M has been continuously declining in India in recent decades, it is still substantially  
377 higher among certain social groups and regions in the country, particularly before the implementation of the NRHM. This study  
378 documented disparities in U5M by caste groups in the high mortality regions of India in recent years, using nationally representative  
379 data. The novelty of the study lies therein that, to our knowledge, this is the first study in India that provides district level estimates of  
380 U5M and systematically investigates the factors explaining U5MR by caste groups using the most recent DHS data. This is also the first  
381 study to document the association between caste and U5M in the post-NRHM period in India.

382  
383  
384 Our study highlights a few important findings. First, the disparity in U5M, was profound by caste groups during the pre-NRHM period,  
385 and has been reduced drastically in recent years. This success may be attributed to the NRHM under which special provision has been  
386 made for maternal and child health care services for women and children belonging to deprived castes. For instance, under the NHM, a  
387 conditional cash transfer scheme was introduced for institutional deliveries. In the high performing states of India, this cash was given  
388 only to women from deprived caste groups, whereas in low performing states, this cash was available to all poor as well as deprived  
389 castes women [39–41]. Despite the reduction in the parallel gap in U5M between caste groups over time, our study further reveals that  
390 the caste gap in U5MR is persistent even in the NRHM/NHM period. Children belonging to deprived castes have a higher likelihood of  
391 dying than those belonging to non-deprived castes. Our analysis shows that this association remains significant for children from SCs  
392 even after controlling for other background characteristics. Thus, our study reconfirms that children belonging to deprived castes are still  
393 in a disadvantaged position in terms of mortality outcomes. These findings are consistent with those of previous national and sub-national  
394 studies [16,17,21,42]. Our results also indicate that macro level indicators of U5M at district level shows that the U5MR of the SC/ST  
395 population is higher than that of the non-SC/ST population. We observed a geographical clustering of U5MR in the studied area.

396  
397  
398 Secondly, this study contributes to the debate on whether maternal education or household economic status is more conducive for child  
399 mortality reeducation. There are numerous previous studies that documents the negative and strong role of education on mortality through  
400 various mechanisms such as increased knowledge, better accessibility, use of modern health care facilities, higher mobility etc.[43–47].  
401 Yet, there is continuous debate around whether education should be prioritized over wealth for preventing under-five deaths. While many  
402 previous studies have described the independent effect of both maternal education and wealth status of the household on child mortality,  
403 some studies established that maternal education is the single most important determinant of child survival at all levels and its effects on  
404 child survival are stronger than those of household wealth [48–50]. A study based on 42 developing countries, however, argued that  
405 although higher education levels were associated with disproportionately greater returns to child health, the pattern for household wealth  
406 was erratic: in many countries there were diminishing returns to child health at higher levels of household wealth [51]. Our study in  
407 India's high mortality areas support previous findings that maternal education is more important in the reduction of U5M than household  
408 wealth status.

409 The decomposition analysis allows us to gain insight into the relative contribution of various factors in the caste-based gaps in the U5MR.  
410 It demonstrates that the current gap in U5M by caste groups is mainly due to their disadvantages in terms of the economic conditions and  
411 educational status of their parents. Unlike the results from the regression analysis, household economic status contributes the most to the  
412 gap, followed by parental education. This indicates that there is a greater economic divide between well-off and deprived caste groups,  
413 which explains the majority of the gap in U5M between caste groups. Since more than 50% of SC/ST households are from the poorest  
414 backgrounds, it is not surprising that household economic status turned out to be the largest contributing factor in widening the caste gap  
415 in terms of U5M. It is argued that poor SC/ST households do not have enough resources for child and maternal health care expenses. In  
416 contrast, the non-SC/ST population is economically better off and more educated. They may have a more advanced view, more  
417 knowledge about child care and preventive care (greatly associated with the modern healthcare system), as well as higher confidence in  
418 dealing with health care providers and a greater ability and readiness to travel outside the community for their health needs [52], all of  
419 which may help to reduce poor child health outcomes.

420

421

422 Following the wealth status of the household, maternal educational attainment contributes significantly to widening the caste-based gap  
423 in U5M. This is consistent with the findings of previous research [23,53–55]. It is possible that the lower level of education among SCs  
424 and STs is accompanied by a low awareness of health services. This includes less knowledge of the benefits of preventive child health  
425 care, use of traditional health care, poor communication with the husband and other family members on health-related issues and poor  
426 decision-making power within the family, low self-confidence, poor survival abilities and poor negotiating skills with health care  
427 providers [56]. The type of cooking fuel used by households also positively contributed to widening the gap, which is an indication of  
428 less access to clean fuel by the disadvantaged caste groups. It is interesting to note that the two program related variables together  
429 contributed 24% to the gap in the U5MR. This is an interesting finding from a policy perspective as it shows that there is still scope to  
430 uplift access to health facilities for women and children belonging to deprived caste groups in the study area.

431

432

433 Despite the U5MR of our study area experiencing a faster decline in the most recent years compared to the stagnation in mortality  
434 reduction that was observed in the early 2000s [57], this reduction is still not enough to achieve the SDG goals on preventable neonatal  
435 and under-five deaths [3]. Previous findings indicate that nearly all districts of Uttar Pradesh, Bihar, Madhya Pradesh, and Chhattisgarh  
436 will fail to achieve the SDG3 goal on neonatal mortality rate [3]. Similarly, in Uttar Pradesh, not a single district is expected to meet the  
437 target for U5MR as set out in SDG3 [3]. Since our findings demonstrate that maternal education is relatively more effective in U5MR  
438 reduction, there is a greater need to raise the level of educational attainment, particularly secondary education among girls in the high  
439 focus states of India. At the same time, programs uplifting the economic status of disadvantaged groups is equally important for a faster  
440 and sustainable reduction of U5MR in the high focus states. To improve universal coverage and access to maternal and child health care  
441 services, emphasis should be placed on creating awareness of the district level intervention program through community-based awareness  
442 programs, as well as on educating parents about the possible high-risk factors and preventive measures associated with child health [3].  
443 Another possible initiative might be to involve the parents of SC and ST children in health-related intervention programs at village or  
444 community level and educate them about preventive care for their infants at home and the importance of antenatal care for women during



445 pregnancy. In addition, sensitization to and creating awareness around preventive health care, maternal care, nutrition, awareness about  
446 infectious diseases, the benefits of hygiene and sanitation, and subsidized maternal health care services among SC and ST populations,  
447 should be increased through outreach programs.

448

## 449 **Supporting information**

450 **S1 Table. Estimated Districtwise Under-five mortality rate for ten-years periods preceding the**  
451 **survey for SC, ST, Non-SC/ST and Total in high focus states of India, 2015-16.**  
452 **(PDF)**

453

454 **Appendix S1. Description of Fairlie method.**  
455 **(DOC)**

456

457

## 458 **References**

459

- 460 1. UNICEF. United Nations Inter-agency Group for Child Mortality Estimation. Levels & trends in child mortality:  
461 report 2013. New York. 2013.
- 462 2. UNICEF. United Nations Inter-agency Group for Child Mortality Estimation. Levels & trends in child mortality:  
463 report 2015. New York. 2015.
- 464 3. Bora JK, Saikia N. Neonatal and under-five mortality rate in Indian districts with reference to Sustainable  
465 Development Goal 3: An analysis of the National Family Health Survey of India (NFHS), 2015–2016. *PLoS One*.  
466 2018;13(7):e0201125.
- 467 4. Shinde PK. Dalit and Human Rights: Security and Rights Implications. New Delhi: Gyan Publishing House; 2005.  
468 p. 296.
- 469 5. Deshpande A. Caste at birth? Redefining disparity in India. *Rev Dev Econ*. 2001;5(1):130–44.
- 470 6. Trivedi PK, Goli S, Fahimuddin SK. Does Untouchability Exist among Muslims? *Econ Polit Wkly*. 2016;51(15):33.
- 471 7. Parikh S. The politics of preference: democratic institutions and affirmative action in the United States and India.  
472 University of Michigan Press; 1997.
- 473 8. Borooah VK. Caste, inequality, and poverty in India. *Rev Dev Econ*. 2005;9(3):399–414.
- 474 9. Mitra A, Singh P. Trends in literacy rates and schooling among the scheduled tribe women in India. *Int J Soc Econ*.  
475 2008;35(1/2):99–110.
- 476 10. Van de Poel E, Speybroeck N. Decomposing malnutrition inequalities between Scheduled Castes and Tribes and the  
477 remaining Indian population. *Ethn Health*. 2009;14(3):271–87.
- 478 11. Government of India PC. Twelfth Five Year Plan (2012-2017) of the Government of India [online] [Internet]. 2012.  
479 Available from: <http://planningcommission.gov.in/plans/planrel/fiveyr/welcome.html>
- 480 12. Baru R, Acharya A, Acharya S, Kumar AS, Nagaraj K. Inequities in access to health services in India: caste, class  
481 and region. *Econ Polit Wkly*. 2010;49–58.
- 482 13. Subramanian SV, Smith GD, Subramanyam M. Indigenous health and socioeconomic status in India. *PLoS Med*.  
483 2006;3(10):e421.
- 484 14. UNICEF. Maternal And Perinatal Death Inquiry and Response. 2008. [Httpwww Unicef OrgindiaMAPEDIR-Matern-](http://www.unicef.org/india/Mapedir-Matern-India_Pdf_Fa_2011)  
485 [India Pdf Fa. 2011;](http://www.unicef.org/india/Mapedir-Matern-India_Pdf_Fa_2011)
- 486 15. Wax E. Lure of cash aids India's efforts to reduce number of women dying in childbirth. *Wash Post*. 2010;
- 487 16. Das MB, Kapoor S, Nikitin D. A closer look at child mortality among Adivasis in India. 2010;
- 488 17. Dommaraju P, Agadjanian V, Yabiku S. The pervasive and persistent influence of caste on child mortality in India.  
489 *Popul Res Policy Rev*. 2008;27(4):477–95.
- 490 18. Mohindra KS, Haddad S, Narayana D. Women's health in a rural community in Kerala, India: do caste and  
491 socioeconomic position matter? *J Epidemiol Community Health*. 2006;60(12):1020–6.
- 492 19. Nguyen K-H, Jimenez-Soto E, Dayal P, Hodge A. Disparities in child mortality trends: what is the evidence from  
493 disadvantaged states in India? the case of Orissa and Madhya Pradesh. *Int J Equity Health*. 2013;12(1):45.
- 494 20. Po JY, Subramanian SV. Mortality burden and socioeconomic status in India. *PLoS One*. 2011;6(2):e16844.
- 495 21. Ram B, Singh A, Yadav A. The persistent caste divide in India's infant mortality: A study of Dalits (ex-untouchables),  
496 Adivasis (indigenous peoples), Other Backward Classes, and forward castes. *Can Stud Popul*. 2017;43(3–4):249–63.



- 497 22. Sahu D, Nair S, Singh L, Gulati BK, Pandey A. Levels, trends & predictors of infant & child mortality among  
498 Scheduled Tribes in rural India. *Indian J Med Res.* 2015;141(5):709.
- 499 23. Singh-Manoux A, Dugravot A, Smith GD, Subramanyam M, Subramanian SV. Adult education and child mortality  
500 in India: the influence of caste, household wealth, and urbanization. *Epidemiol Camb Mass.* 2008;19(2):294.
- 501 24. Subramanian SV, Nandy S, Irving M, Gordon D, Lambert H, Davey Smith G. The mortality divide in India: the  
502 differential contributions of gender, caste, and standard of living across the life course. *Am J Public Health.*  
503 2006;96(5):818–25.
- 504 25. Ranjan M, Dwivedi LK, Mishra R. Infant mortality differentials among the tribal and non-tribal populations of  
505 Central and Eastern India. *Int J Popul Stud.* 2016;2(2).
- 506 26. Government of India. Janani Suraksha Yojana, National Health Mission, Ministry of Health and Family Welfare.  
507 Government of India. [Internet]. 2014c. Available from: [http://nrhm.gov.in/nrhm-components/rmnc-h-a/maternal-](http://nrhm.gov.in/nrhm-components/rmnc-h-a/maternal-health/janani-suraksha-yojana/background.html)  
508 [health/janani-suraksha-yojana/](http://nrhm.gov.in/nrhm-components/rmnc-h-a/maternal-health/janani-suraksha-yojana/background.html) background.html.
- 509 27. Fadel SA, Rasaily R, Awasthi S, Begum R, Black RE, Gelband H, et al. Changes in cause-specific neonatal and 1–  
510 59-month child mortality in India from 2000 to 2015: a nationally representative survey. *The Lancet.*  
511 2017;390(10106):1972–80.
- 512 28. Vellakkal S, Reddy H, Gupta A, Chandran A, Fledderjohann J, Stuckler D. A qualitative study of factors impacting  
513 accessing of institutional delivery care in the context of India’s cash incentive program. *Soc Sci Med.* 2017;178:55–  
514 65.
- 515 29. Fairlie RW. An extension of the Blinder-Oaxaca decomposition technique to logit and probit models. *J Econ Soc*  
516 *Meas.* 2005;30(4):305–16.
- 517 30. IIPS, ICF. National Family Health Survey (NFHS-4), 2015-16. International Institute for Population Sciences (IIPS),  
518 Mumbai, India; 2017.
- 519 31. Kumar C, Singh PK, Rai RK. Under-five mortality in high focus states in India: a district level geospatial analysis.  
520 *PLoS One.* 2012;7(5):e37515.
- 521 32. Ladusingh L, Gupta AK, Yadav A. Ecological context of infant mortality in high-focus states of India. *Epidemiol*  
522 *Health.* 2016;38.
- 523 33. Gupta AK, Ladusingh L, Borkotoky K. Spatial clustering and risk factors of infant mortality: district-level assessment  
524 of high-focus states in India. *Genus.* 2016;72(1):1–17.
- 525 34. James KS. Recent shifts in infant mortality in India: An exploration. *Econ Polit Wkly.* 2014;49(3):14–7.
- 526 35. Rutstein SO, Rojas G. Guide to DHS statistics. Calverton MD ORC Macro. 2003;
- 527 36. Masset E. “SYNCRATES: Stata module to compute child mortality rates using synthetic cohort probabilities,”  
528 Statistical Software Components S458149, Boston College Department of Economics. 2016.
- 529 37. Blinder AS. Wage discrimination: reduced form and structural estimates. *J Hum Resour.* 1973;436–55.
- 530 38. Oaxaca R. Male-female wage differentials in urban labor markets. *Int Econ Rev.* 1973;693–709.
- 531 39. Government of India. Janani Suraksha Yojana: Guidelines for Implementation. Ministry of Health and Family  
532 Welfare. New Delhi; 2010.
- 533 40. Lim SS, Dandona L, Hoisington JA, James SL, Hogan MC, Gakidou E. India’s Janani Suraksha Yojana, a conditional  
534 cash transfer programme to increase births in health facilities: an impact evaluation. *The Lancet.*  
535 2010;375(9730):2009–23.
- 536 41. United Nations Population Fund-India. Concurrent assessment of Janani Suraksha Yojana (JSY) in selected states:  
537 Bihar, Madhya Pradesh, Orissa, Rajasthan, Uttar Pradesh. United Nations Population Fund–India. New Delhi; 2009.
- 538 42. Dwivedi SN, Begum S, Dwivedi AK, Pandey A. Determinants of infant mortality in rural India: A three-level model.  
539 *Health (N Y).* 2013;5(11):1742.
- 540 43. Bloom SS, Wypij D, Gupta MD. Dimensions of women’s autonomy and the influence on maternal health care  
541 utilization in a north Indian city. *Demography.* 2001;38(1):67–78.
- 542 44. Caldwell JC, Reddy PH, Caldwell P. The social component of mortality decline: an investigation in South India  
543 employing alternative methodologies. *Popul Stud.* 1983;37(2):185–205.
- 544 45. Das Gupta M. Death clustering, mothers’ education and the determinants of child mortality in rural Punjab, India.  
545 *Popul Stud.* 1990;44(3):489–505.
- 546 46. Muhuri PK. Health programs, maternal education, and differential child mortality in Matlab, Bangladesh. *Popul Dev*  
547 *Rev.* 1995;813–34.
- 548 47. Vikram K, Vanneman R, Desai S. Linkages between maternal education and childhood immunization in India. *Soc*  
549 *Sci Med.* 2012;75(2):331–9.
- 550 48. Fuchs R, Pamuk E, Lutz W. Education or wealth: which matters more for reducing child mortality in developing  
551 countries? *Vienna Yearb Popul Res.* 2010;175–99.
- 552 49. Lutz W, Kebede E. Education and Health: Redrawing the Preston Curve. *Popul Dev Rev.* 2018;44(2):343–61.
- 553 50. Pamuk ER, Fuchs R, Lutz W. Comparing relative effects of education and economic resources on infant mortality in  
554 developing countries. *Popul Dev Rev.* 2011;37(4):637–64.
- 555 51. Boyle MH, Racine Y, Georgiades K, Snelling D, Hong S, Omariba W, et al. The influence of economic development  
556 level, household wealth and maternal education on child health in the developing world. *Soc Sci Med.*  
557 2006;63(8):2242–54.
- 558 52. Cleland JG, Van Ginneken JK. Maternal education and child survival in developing countries: the search for  
559 pathways of influence. *Soc Sci Med.* 1988;27(12):1357–68.

- 560 53. Bora JK, Raushan R., Lutz W. Contribution of education to infant and under-five mortality disparities among caste  
561 groups in India. Vienna Institute of Demography Working Papers; 2018.
- 562 54. Choudhury PK. Explaining the Role of Parental Education in the Regional Variations in Infant Mortality in India.  
563 Asia Pac Policy Stud. 2015;2(3):544–72.
- 564 55. Saikia N, Singh A, Jasilionis D, Ram F. Explaining the rural-urban gap in infant mortality in India. Demogr Res.  
565 2013;29:473–506.
- 566 56. Burgard S. Race and pregnancy-related care in Brazil and South Africa. Soc Sci Med. 2004;59(6):1127–46.
- 567 57. Saikia N, Jasilionis D, Ram F, Shkolnikov VM. Trends and geographic differentials in mortality under age 60 in  
568 India. Popul Stud. 2011;65(1):73–89.
- 569

bioRxiv preprint doi: <https://doi.org/10.1101/516070>; this version posted January 10, 2019. The copyright holder for this preprint (which was not certified by peer review) is the author/funder, who has granted bioRxiv a license to display the preprint in perpetuity. It is made available under aCC-BY 4.0 International license.

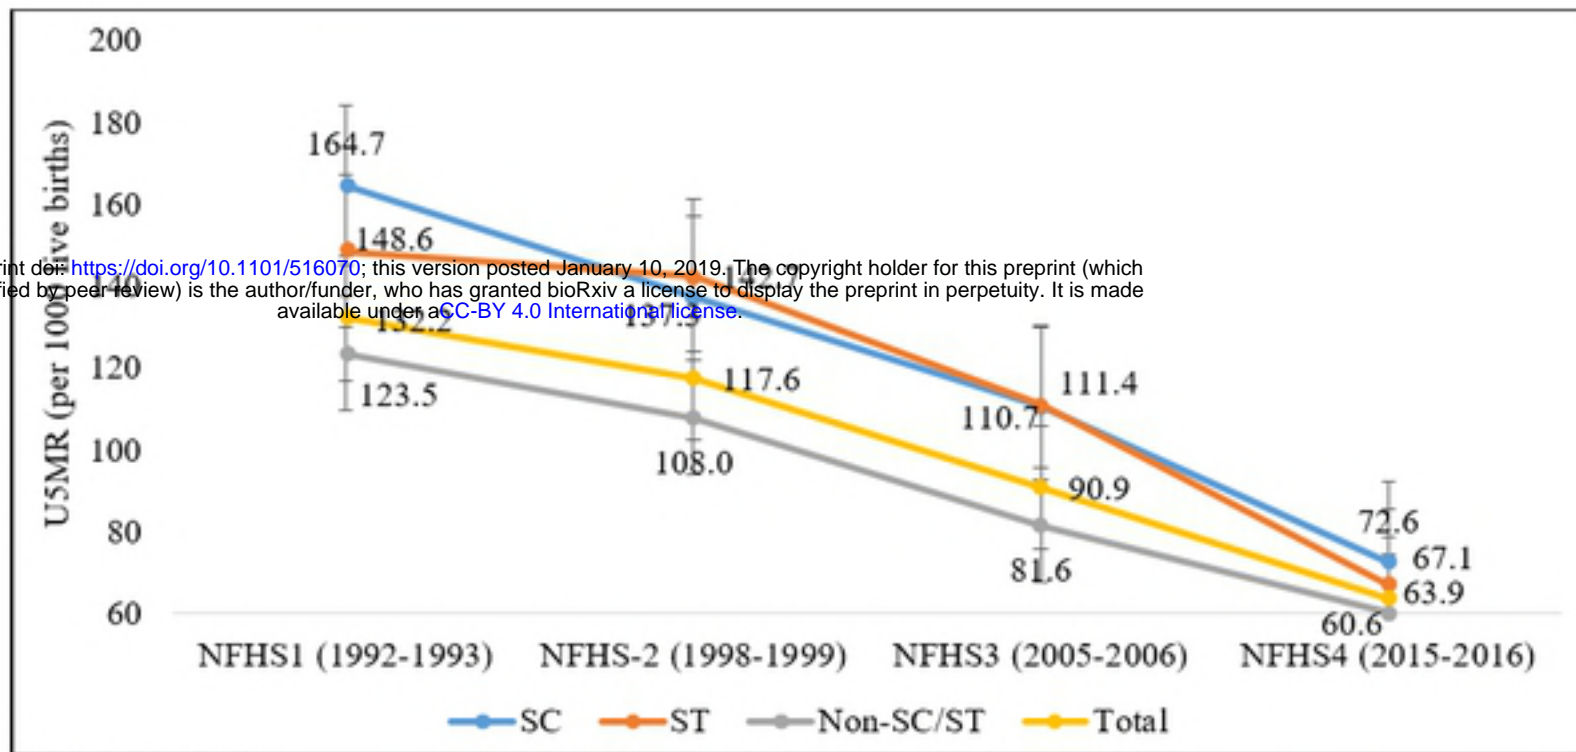

Source: NFHS 1-4

Note: Authors estimated U5MR per 1000 live births for the five-year period preceding the survey

Fig 1. Trends in U5MR among social groups in high focus states, India 1992-2016



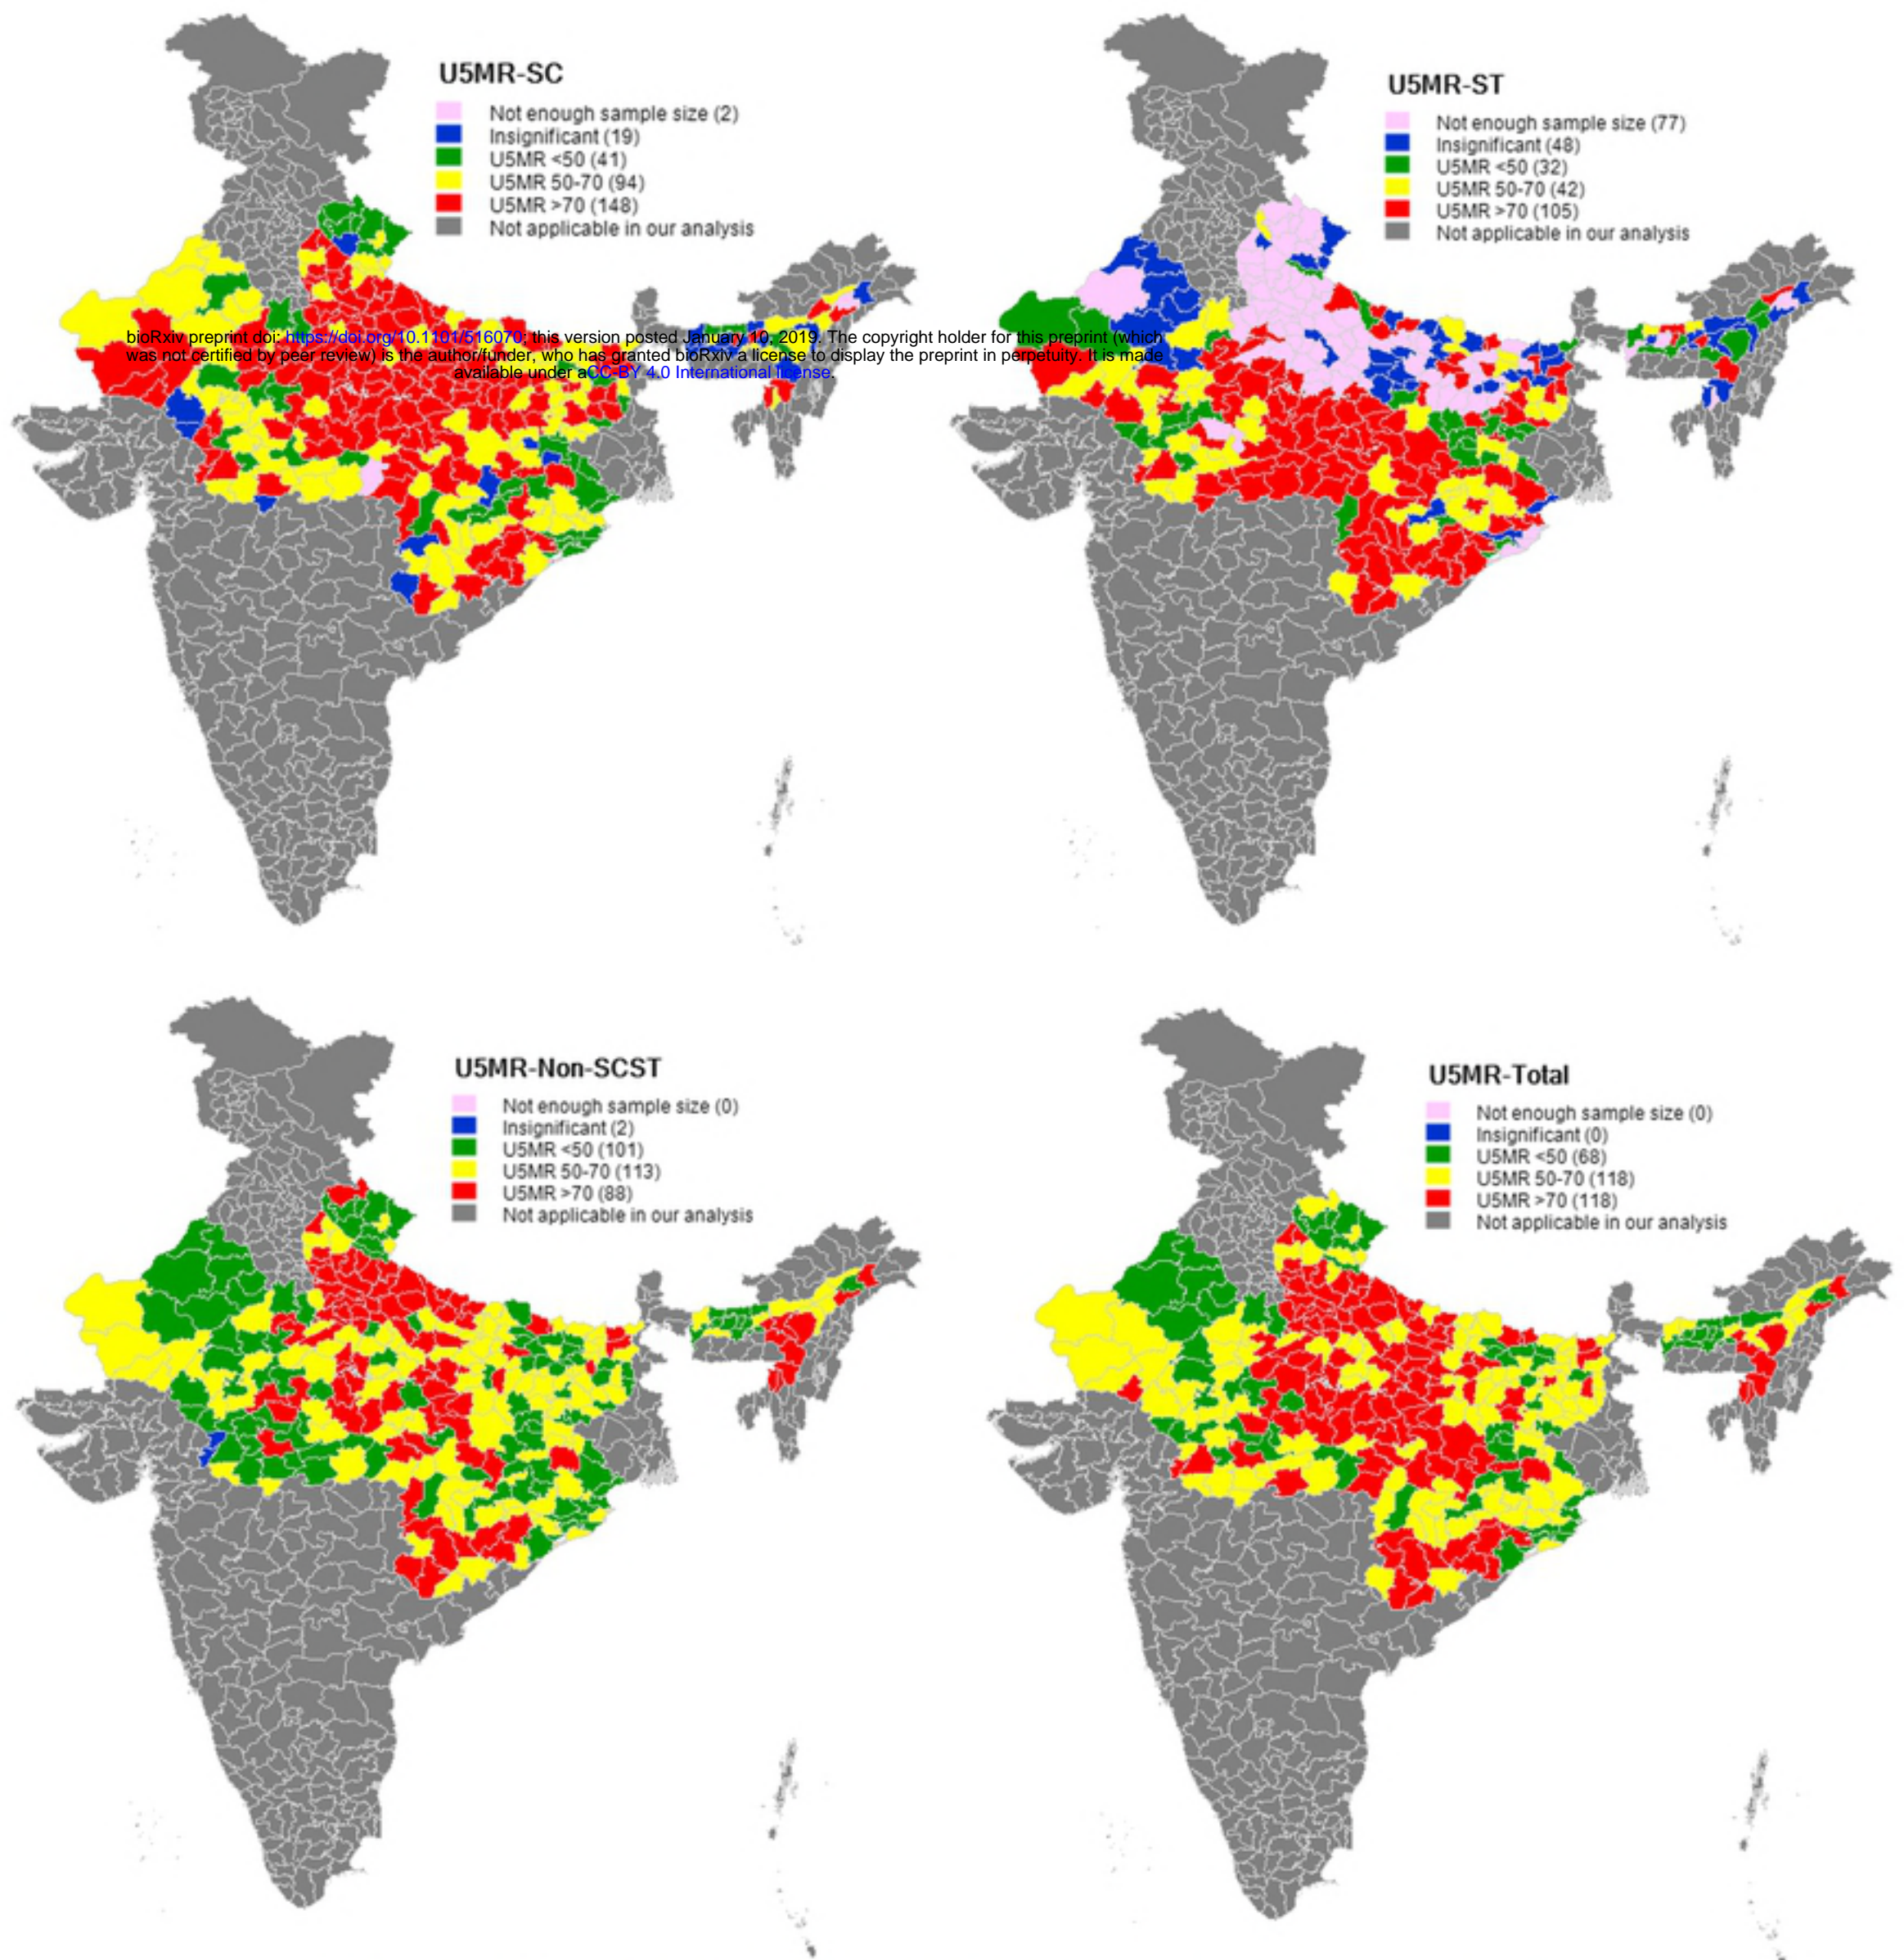

Fig 2. District wise U5MR (per 1000 live births) for SC, ST, non-SC/ST and Total populations in high focus states of India, 2015-16

bioRxiv preprint doi: <https://doi.org/10.1101/516070>; this version posted January 10, 2019. The copyright holder for this preprint (which was not certified by peer review) is the author/funder, who has granted bioRxiv a license to display the preprint in perpetuity. It is made available under aCC-BY 4.0 International license.

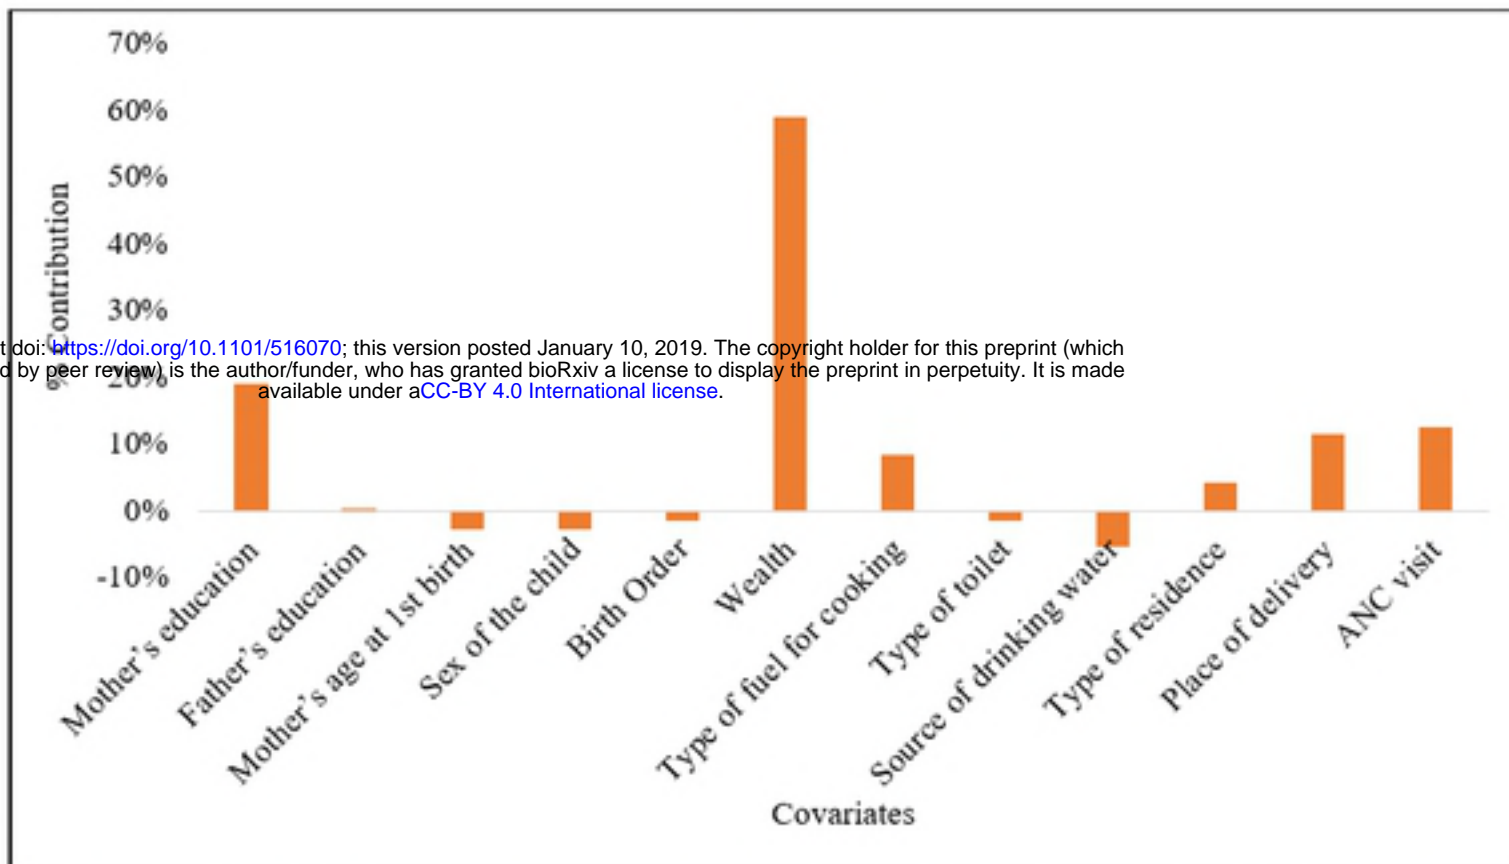

**Fig 3. Results of Fairlie decomposition analysis showing percentage contribution of each covariate to the gap in U5M-risk between caste groups in high focused states of India, 2015-16**
